# Supplementary material for: Management of thermally activated delayed fluorescence using a secondary electron accepting unit in thermally activated delayed fluorescent emitters
Source: Royal Society of Chemistry journal article supplement (doi:10.1039/c9tc01354g), 2019-01-01
Supplement: c9tc01354g1.pdf [file c9tc01354g1.pdf]

## Supporting information

### Management of thermally activated delayed fluorescence using a secondary electron accepting unit in thermally activated delayed fluorescent emitters

Ha Lim Lee<sup>1</sup>, Kyung Hyung Lee<sup>1</sup>, Jun Yeob Lee<sup>1\*</sup>, Wan Pyo Hong<sup>2\*</sup>

<sup>1</sup>School of Chemical Engineering, Sungkyunkwan University

2066, Seobu-ro, Jangan-gu, Suwon-si, Gyeonggi-do, 440-746, Korea

<sup>2</sup>LG Chem, Ltd, LG Science Park, 30, Magokjungang 10-ro, Gangseo-gu, Seoul, 07796, Korea

Fax: (+) 82-31-299-4716

E-mail: [leej17@skku.edu](mailto:leej17@skku.edu), [whongw@lgchem.com](mailto:whongw@lgchem.com)

\* To whom correspondence should be addressed

Key words : electron acceptor, delayed fluorescence, efficiency, emission color

## List of Figures

Figure S1. The power efficiency-luminance plots of (a) TrzBFCz, (b) TrzCNBFCz and (c) Trz2CNBFCz device.

Figure S2. The current efficiency-luminance plots of (a) TrzBFCz, (b) TrzCNBFCz and (c) Trz2CNBFCz device.

(a)

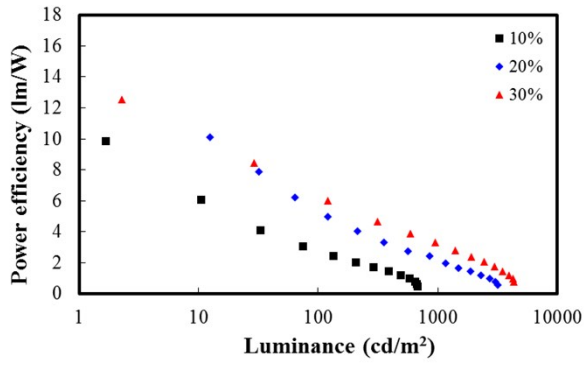

(b)

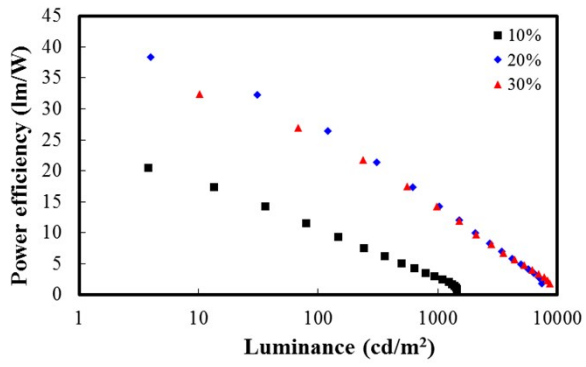

(c)

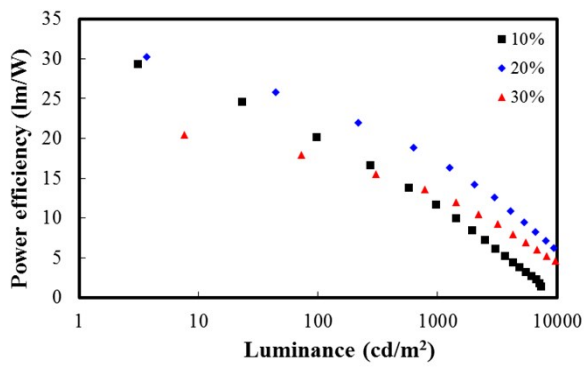

Figure S1.

(a)

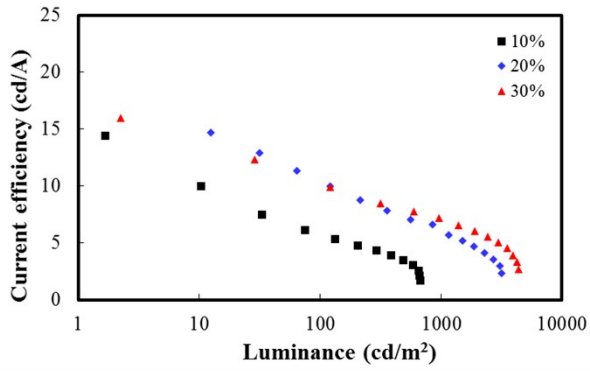

(b)

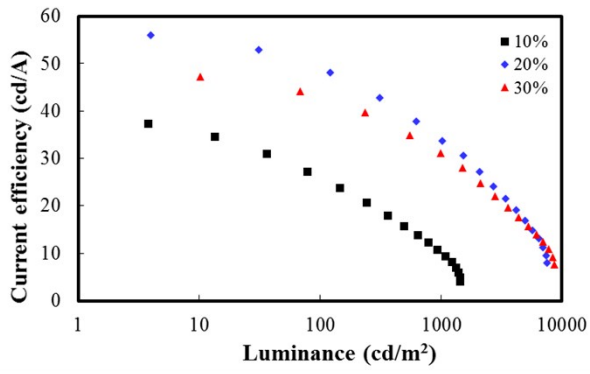

(c)

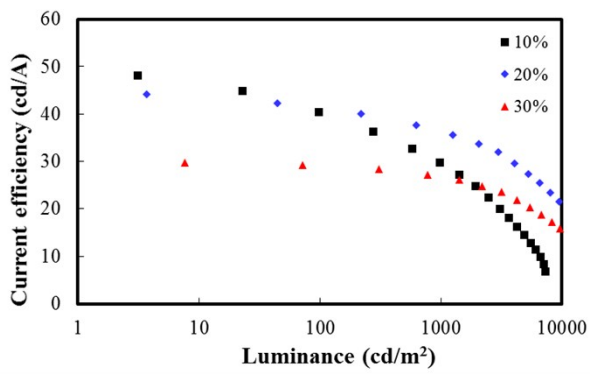

Figure S2.
